# Supplementary material for: Prevalence of brucellosis among patients attending Wau Hospital, South Sudan
Source: PubMed Central journal article supplement (PMC6021100; doi:10.1371/journal.pone.0199315), 2018-06-27
Supplement: pone.0199315.s002.pdf [file pone.0199315.s002.pdf]

# The Republic of South Sudan

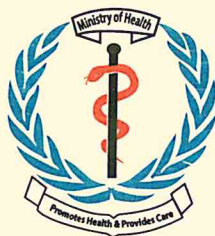

## Ministry of Health

21/04/2016

To: Nuol Aywel Madut Yaji  
Makerere University  
Collage of Veterinary Medicine, Animal Resources & Biosecurity

### RESEARCH APPROVAL LETTER

Dear Madut,

**SUBJECT: Brucellosis at Human- Domestic Animal Interface in Greater Bahr El Ghazal States, South Sudan**

I am writing in response to the request for authorization for the study on “**Brucellosis at Human- Domestic Animal Interface in Greater Bahr El Ghazal States**” As part of your thesis.

After close review on the proposal, I am glad to inform you that the ethical committee at the Ministry of Health for the Republic of South Sudan has approved the study. The ministry acknowledges the importance of the study to provide useful data for intervention police on disease control.

Please, keep the Ministry of Health, Republic of South Sudan and States Ministry of Health of Lakes, Wau, Warrap and Aweil informed on the implementation progress. I look forward to the report and recommendations that will be generated from the study. Note that the study should not be published without the consent of the MOH-RSS.

Best regards.

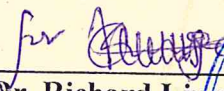  
Dr. Richard Lino Loro Lako  
Director of Research, Monitoring and Evaluation  
Ministry of Health, Republic of South Sudan, Juba

CC: Under Secretary, MOH-RSS  
CC: Director General, preventive Health  
CC: Director Generals, Greater Bahr El Ghazal States
