# Supplementary material for: Prevalence of brucellosis among patients attending Wau Hospital, South Sudan
Source: PubMed Central journal article supplement (PMC6021100; doi:10.1371/journal.pone.0199315), 2018-06-27
Supplement: pone.0199315.s004.pdf [file pone.0199315.s004.pdf]

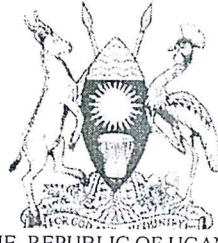

THE REPUBLIC OF UGANDA

MINISTRY OF AGRICULTURE,  
ANIMAL INDUSTRY AND FISHERIES  
WEBSITE: [www.agriculture.go.ug](http://www.agriculture.go.ug)  
DEPARTMENT OF LIVESTOCK HEALTH  
AND ENTOMOLOGY  
P. O. Box 513, ENTEBBE, UGANDA  
E-MAIL: [dlhe.maaif@imul.com](mailto:dlhe.maaif@imul.com)  
TELEPHONE: 256 041 320 627, 320166  
FAX: 256-041-321047, 256-041-321010,  
256-041-321255,320428

In any correspondence on  
this subject please quote **LHE 46/172/406**

30<sup>th</sup> October 2015

Noul Aywel Madut Yajj (PhD - STUDENT)  
C/O  
College of Veterinary Medicine  
Animal Resources and Biosecurity  
Makerere University  
P.O. Box 7062,  
**KAMPALA - UGANDA**

**RE: IMPORT PERMIT FOR IMPORTATION OF SERUM WHOLE  
BLOOD HUMANS AND CATTLE FROM SOUTH SUDAN INTO  
UGANDA**

Your request of 14<sup>th</sup> October 2015 refers; Permission is granted to you to import Serum whole blood humans and cattle for bovine Tuberculosis Research and Training purposes from South Sudan to Makerere University Kampala, Uganda.

The following conditions must be met by the importer;

1. The samples must be handled in a laboratory (or laboratory suite) that operates at containment level 2 as defined by the OIE (OIE Terrestrial Manual 2008, Chapter 1.1.2 Biosafety and Biosecurity in the veterinary Microbiology Laboratory and Animal facilities.
2. The importer must destroy all received biological samples at the end of the study under supervision of the Commissioner Animal Health accordance to requirements for dangerous goods transportation.
3. The importer must confirm that the samples above will neither be used in any form or way for purposes associated with chemical, biological weapon nor will they be re- exported, resold or otherwise transmitted to another institute.

COMMISSIONER ANIMAL HEALTH  
MINISTRY OF AGRICULTURE,  
ANIMAL INDUSTRY AND FISHERIES  
P. O. Box 513, Entebbe - Uganda

4. The sample should be packaged in such away that there will be no leakage during transportation.
5. This import permission is valid for a period of one month from date of issue and is subject to cancellation should conditions necessitating doing so arise.

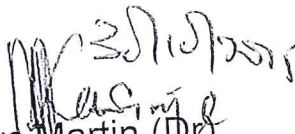  
Kasirye Martin (Dr)

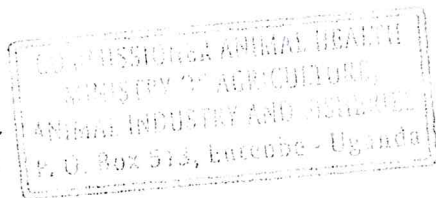

For: **COMMISSIONER ANIMAL HEALTH**

- c.c.: Asst. Commissioner Veterinary Inspections and Regulations  
" Customs officer (EIA)  
" Senior Veterinary Inspector – EIA  
" PVO Diagnostic and Epidemiology

Tel: +256- 778-893284, 782-334637, 772-440994  
Email: [dvdhsuga@yahoo.co.uk](mailto:dvdhsuga@yahoo.co.uk), [nanozibeatrice@yahoo.com](mailto:nanozibeatrice@yahoo.com)
