# Supplementary material for: Prevalence of brucellosis among patients attending Wau Hospital, South Sudan
Source: PubMed Central journal article supplement (PMC6021100; doi:10.1371/journal.pone.0199315), 2018-06-27

# Republic of South Sudan

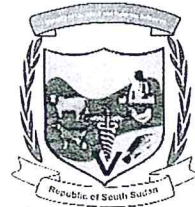

Healthy Livestock - Healthy People -  
Sustainable Development

## Ministry of Livestock and Fisheries Industries

*Office of the Undersecretary*

Ref: RSS/MLFI/DVS/J/39

Date: January 5<sup>th</sup>, 2016

### TO WHOM IT MAY CONCERN

**Re: Authorization for Dr. Noul Aywel Madut Yajj (PhD student) to export samples (Animal and Human) to Kampala – Uganda**

Dear Sir,

Reference to letter numbered SBL.S.NA.2015 dated 14/12/2015 for the ethics committee form Makerere University. Collage of Veterinary Medicine, Animal Resources and Biosecurity. We would like to certify that **Dr. Noul Aywel Madut Yajj (PhD Student)** is doing a research in South Sudan for Brucellosis both in Animal and Human. He has been studying in Makerere University College of Veterinary Medicine, Animal Resources and Biosecurity in Uganda.

The PhD student has been working in the University of Bahr el Ghazal, Collage of Veterinary Science as lecture

We kindly request, therefore, you're esteemed Office to endorse this letter to facilitate the above-cited request to enable the PhD student to export the following samples

#### **Material**

- Bovine serum (1364)
- Human serum (200)
- Lymph node (330)
- Swabs (330)
- Milk (250)

These samples for testing in Kampala – Uganda to help activities for livestock disease control in the Country these samples are required for testing of Brucellosis and Tuberculosis (TB).

Please accept the assurance of our highest regards

*Jor/* Dr. Jacob M. Korok

Acting Director General of Veterinary Services  
Ministry of Livestock and Fisheries Industries  
The Republic of South Sudan – Juba

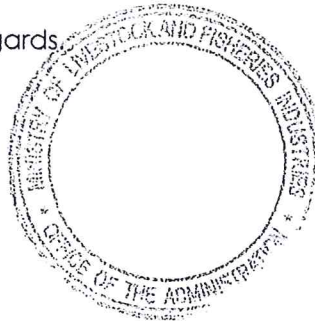

Supplement: pone.0199315.s005.pdf [file pone.0199315.s005.pdf]
